# Supplementary material
Source: publisher figshare collection journal article supplement (https://sage.figshare.com/ndownloader/files/12419705)
Supplement: Supplementary file 1 [file 12419705]

**Appendix 2: Examples of the six treatment evaluation questions with Likert scale end-points presented in parentheses**

*Positively phrased:*

1. How favourable is the treatment? (very unfavourable to very favourable)
2. Would you choose this treatment? (definitely no to definitely yes)
3. Would you recommend this treatment? (definitely no to definitely yes)

*Negatively phrased:*

1. If you were to choose this treatment, how likely do you think it is that you would experience one of its side effects? (very unlikely to very likely)
2. Would you avoid this treatment? (definitely no to definitely yes)
3. How concerned would you be about the side effects? (not concerned to very concerned).
